# Supplementary material
Source: PubMed Central journal article supplement (PMC3675886)

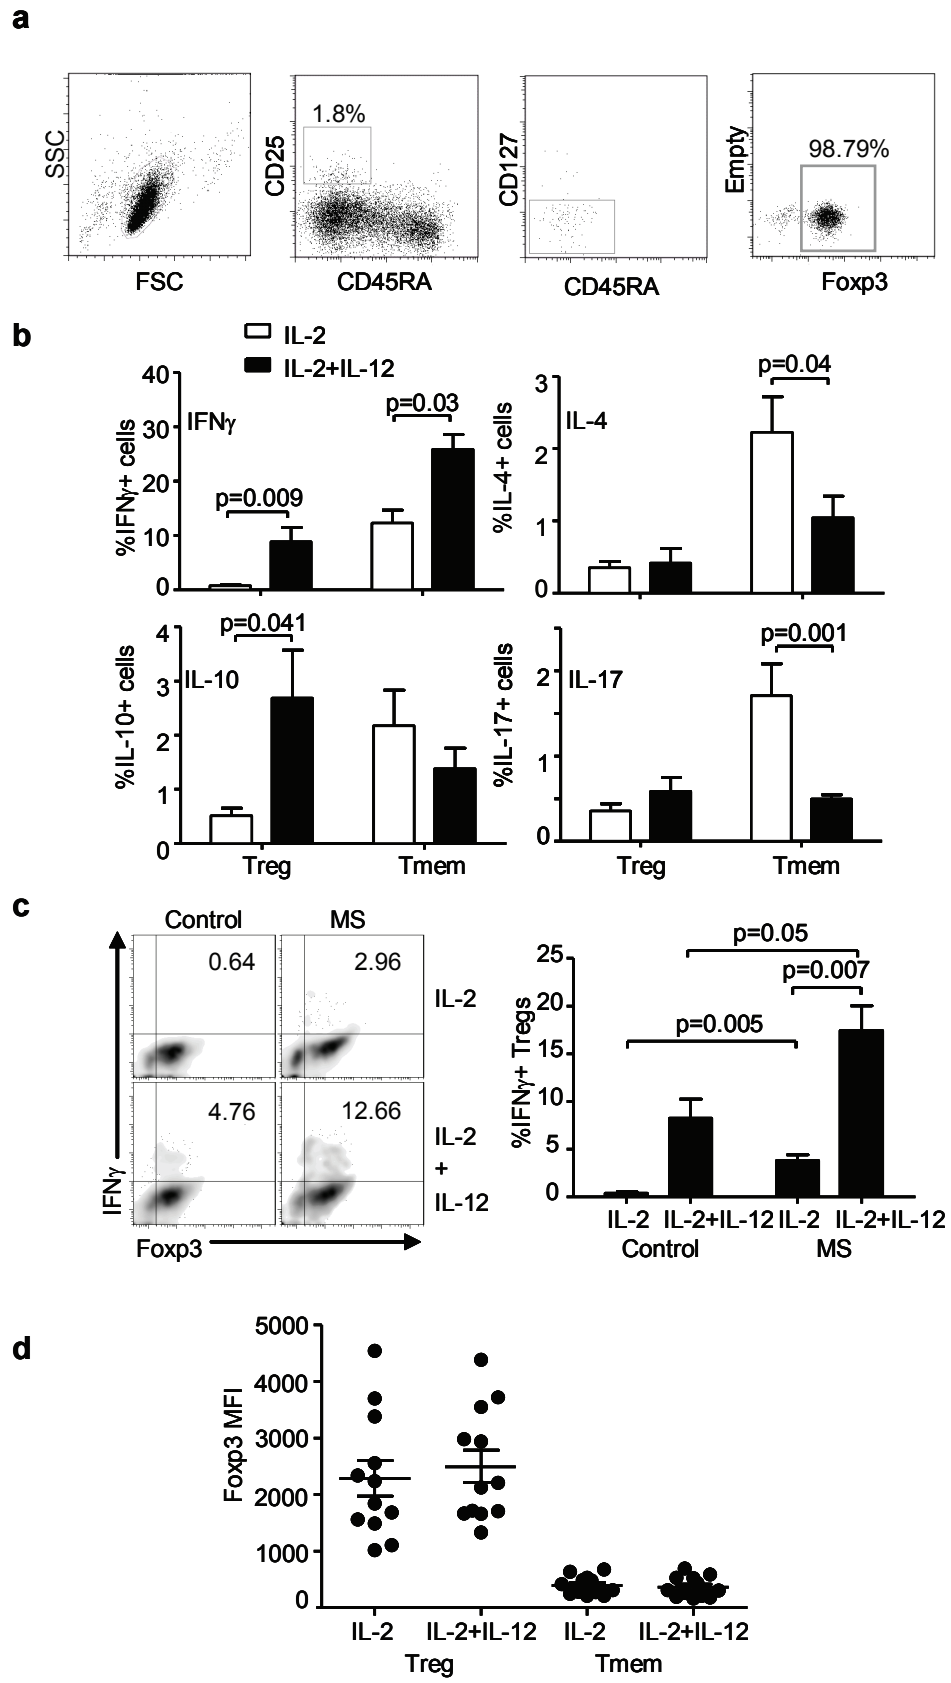

Supplementary Figure 1. *Ex vivo* IFN $\gamma$  production by Tregs

Supplement: NIHMS466509-supplement-Supplementary_fig__1.pdf [file NIHMS466509-supplement-Supplementary_fig__1.pdf]

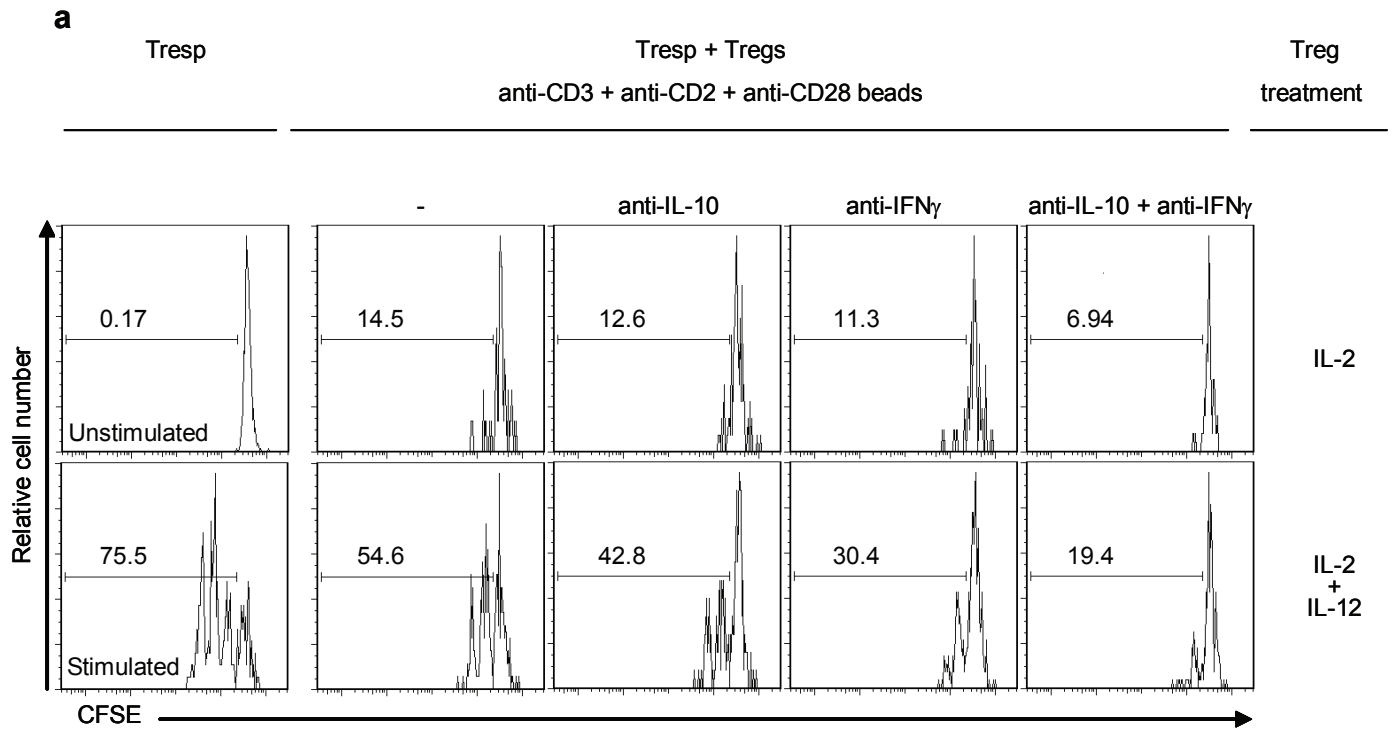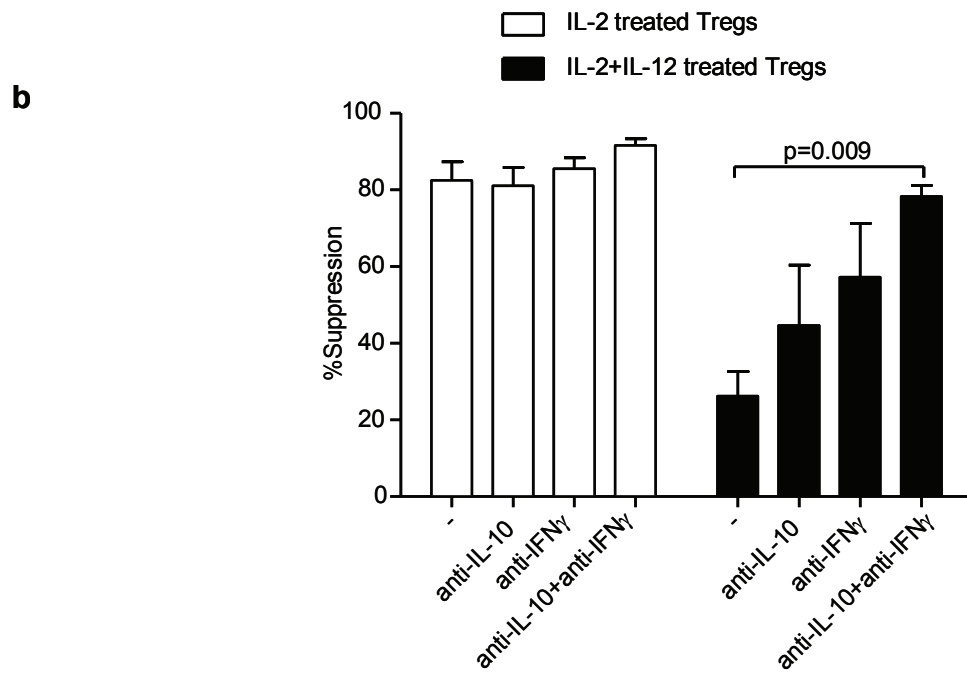

Supplementary Figure 10. Suppression assay with IL-12 treated Tregs in APC-free assays.

Supplement: NIHMS466509-supplement-Supplementary_fig__10.pdf [file NIHMS466509-supplement-Supplementary_fig__10.pdf]

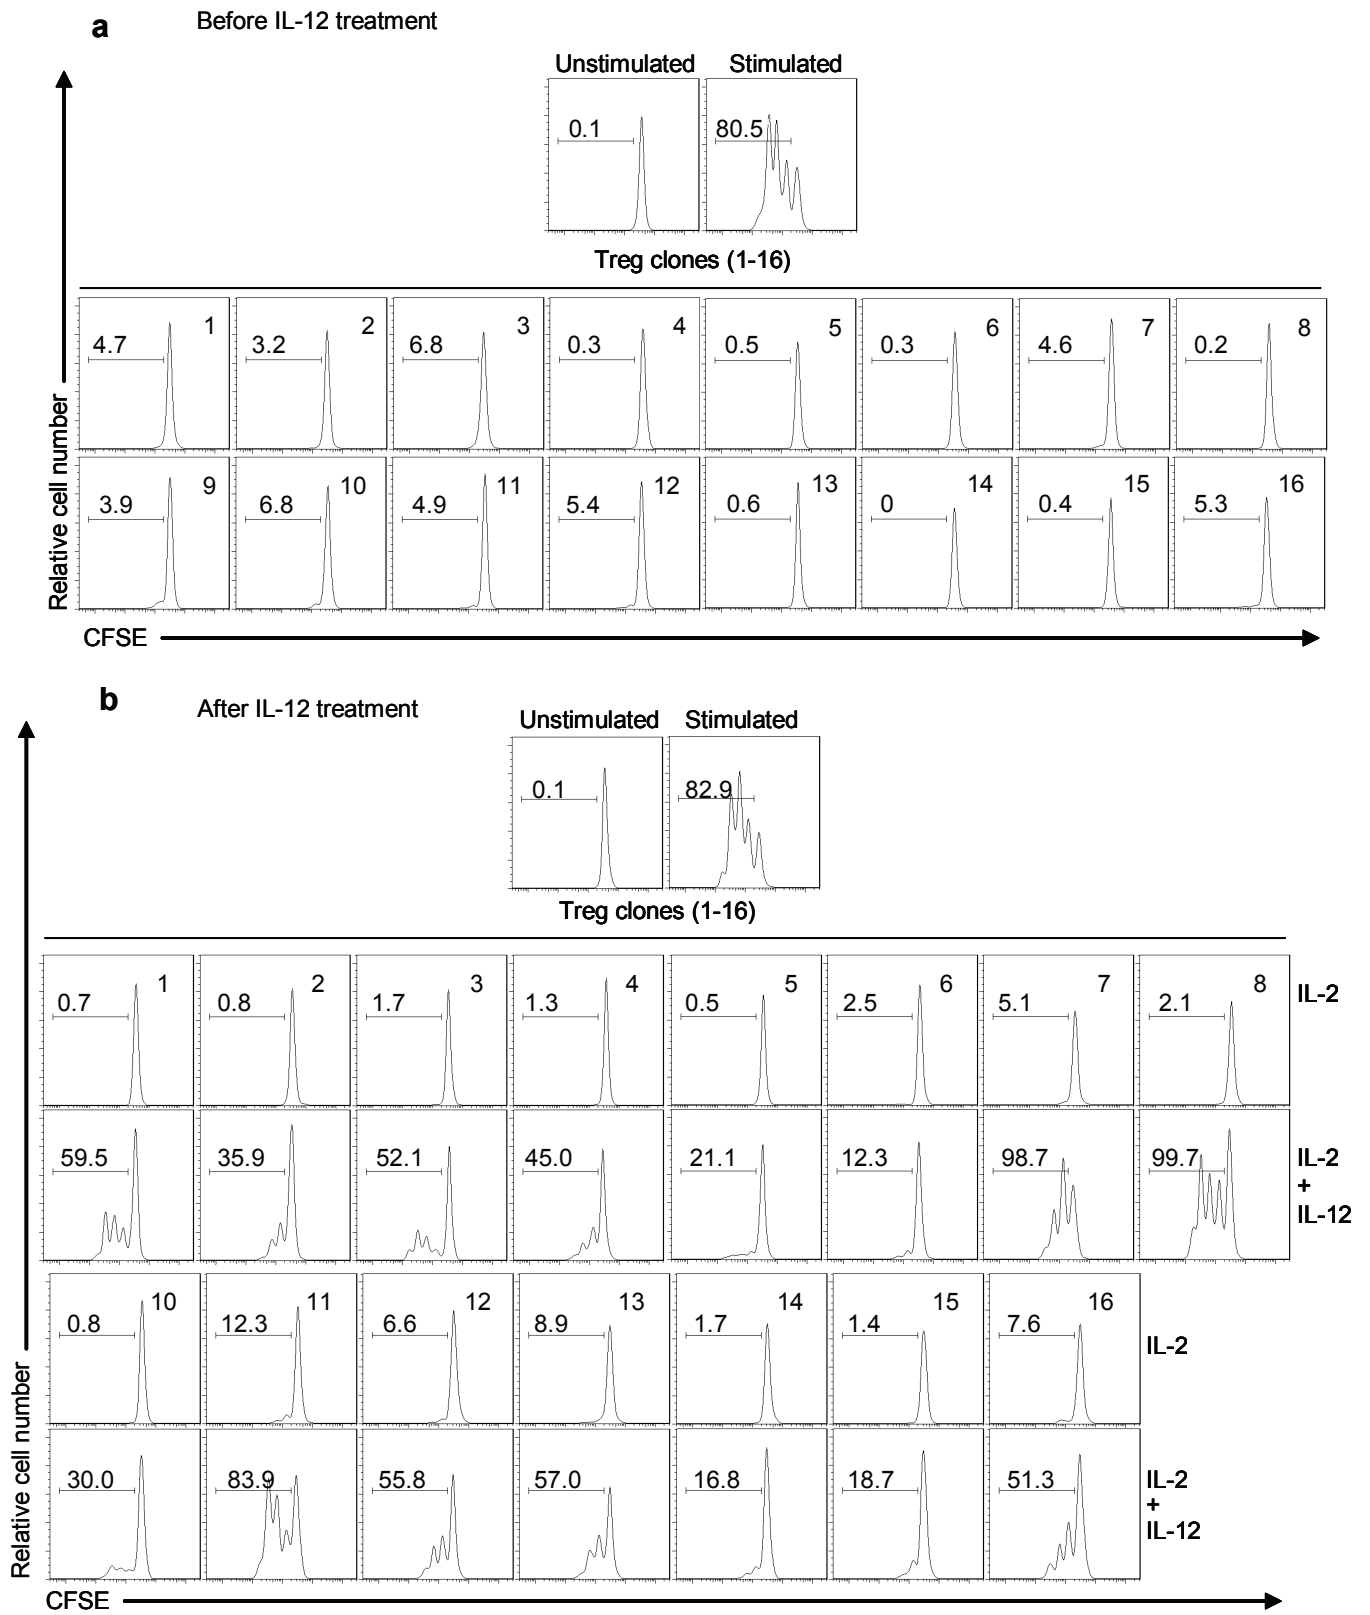

Supplementary Figure 11. Suppression assay with clones

Supplement: NIHMS466509-supplement-Supplementary_fig__11.pdf [file NIHMS466509-supplement-Supplementary_fig__11.pdf]

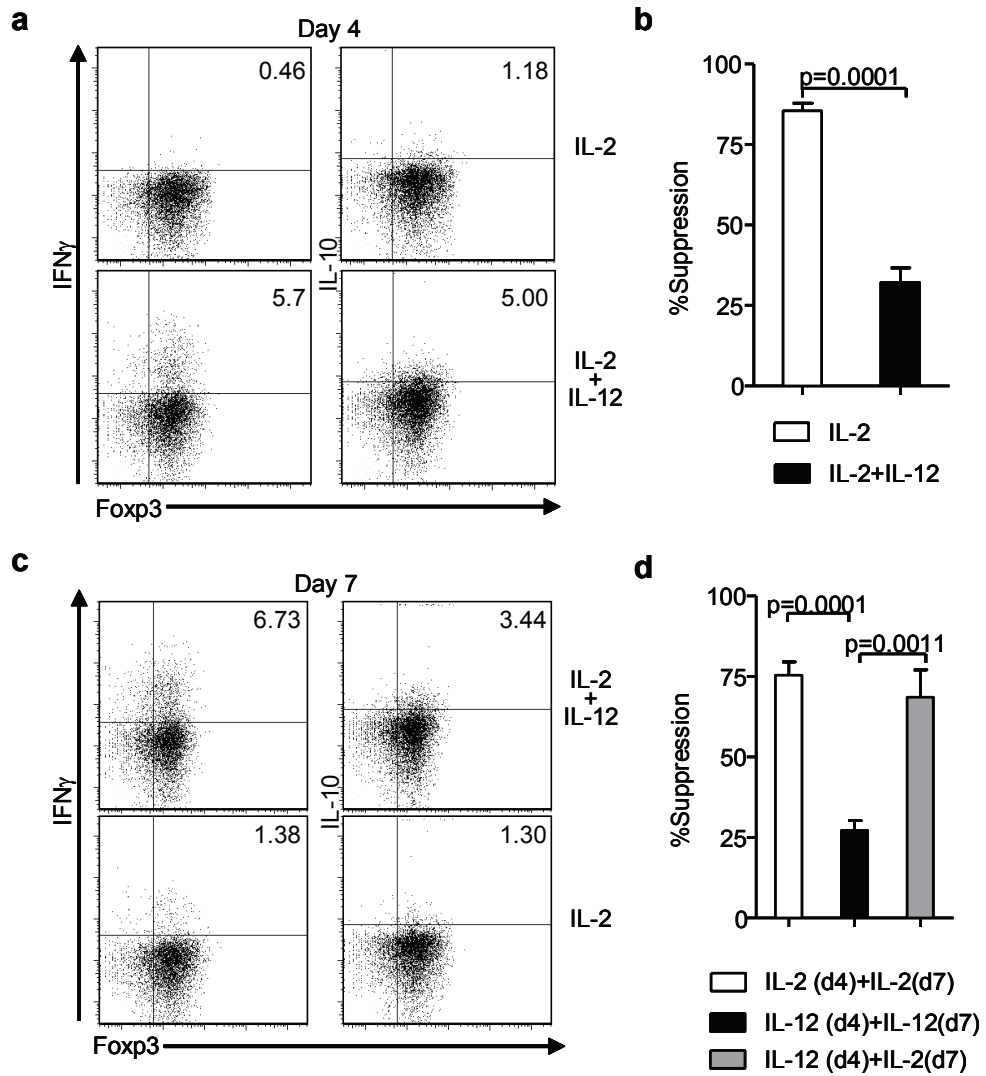

Supplementary Figure 12. Th1-Treg phenotype is reversible

Supplement: NIHMS466509-supplement-Supplementary_fig__12.pdf [file NIHMS466509-supplement-Supplementary_fig__12.pdf]

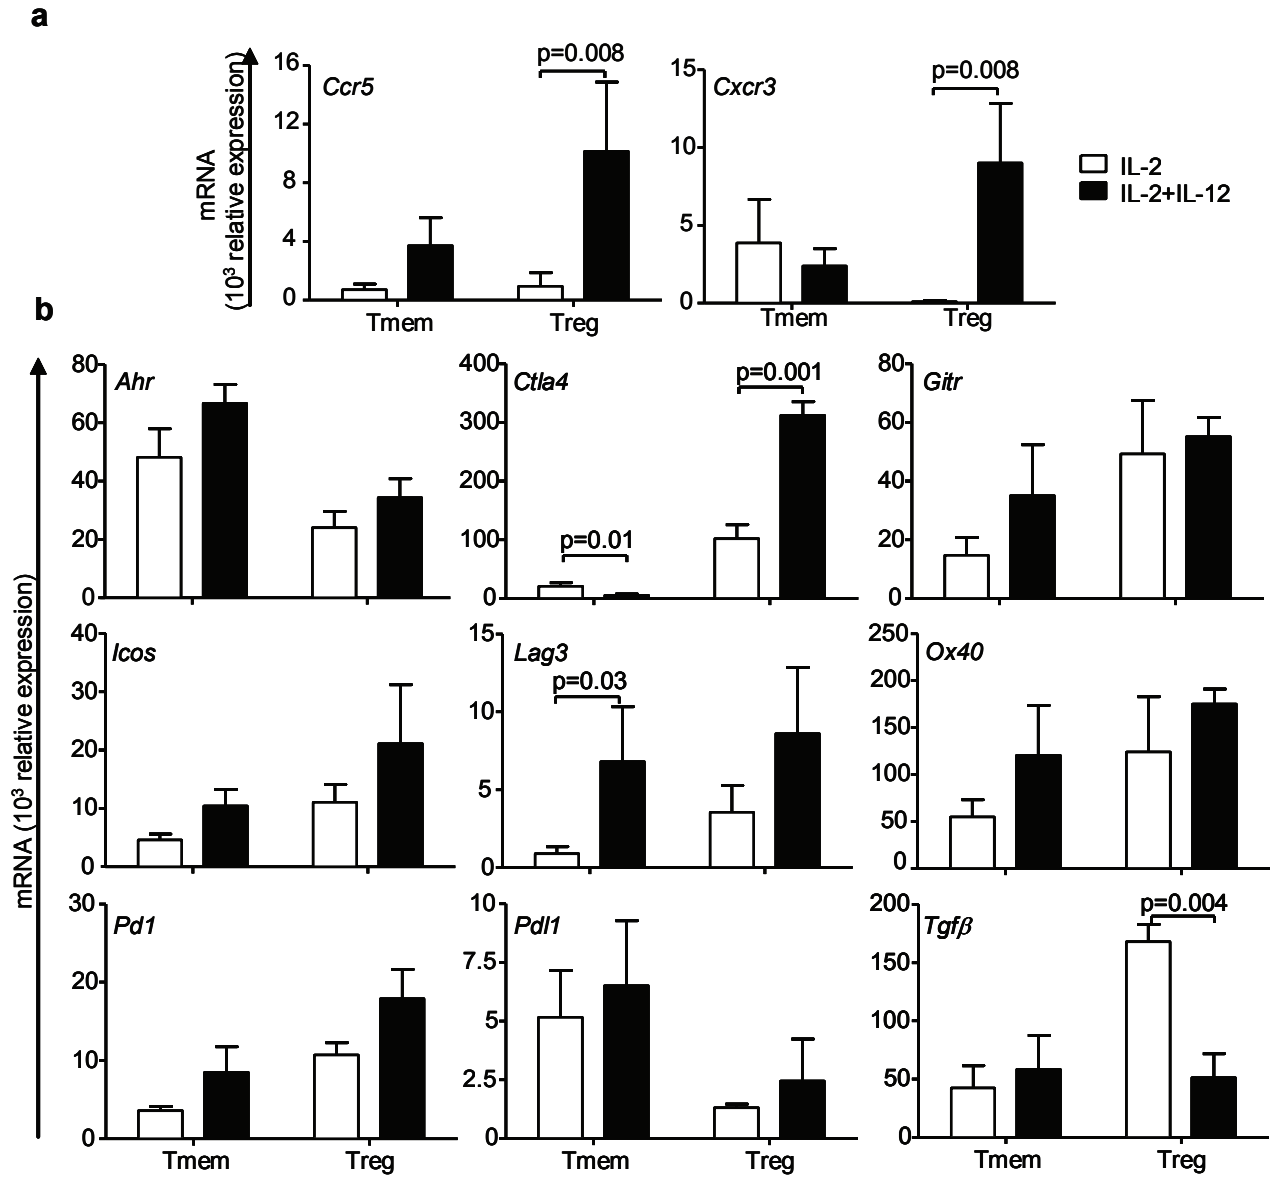

Supplementary Figure 13. Phenotypic characterization of IL-12 driven Th1-Tregs

Supplement: NIHMS466509-supplement-Supplementary_fig__13.pdf [file NIHMS466509-supplement-Supplementary_fig__13.pdf]

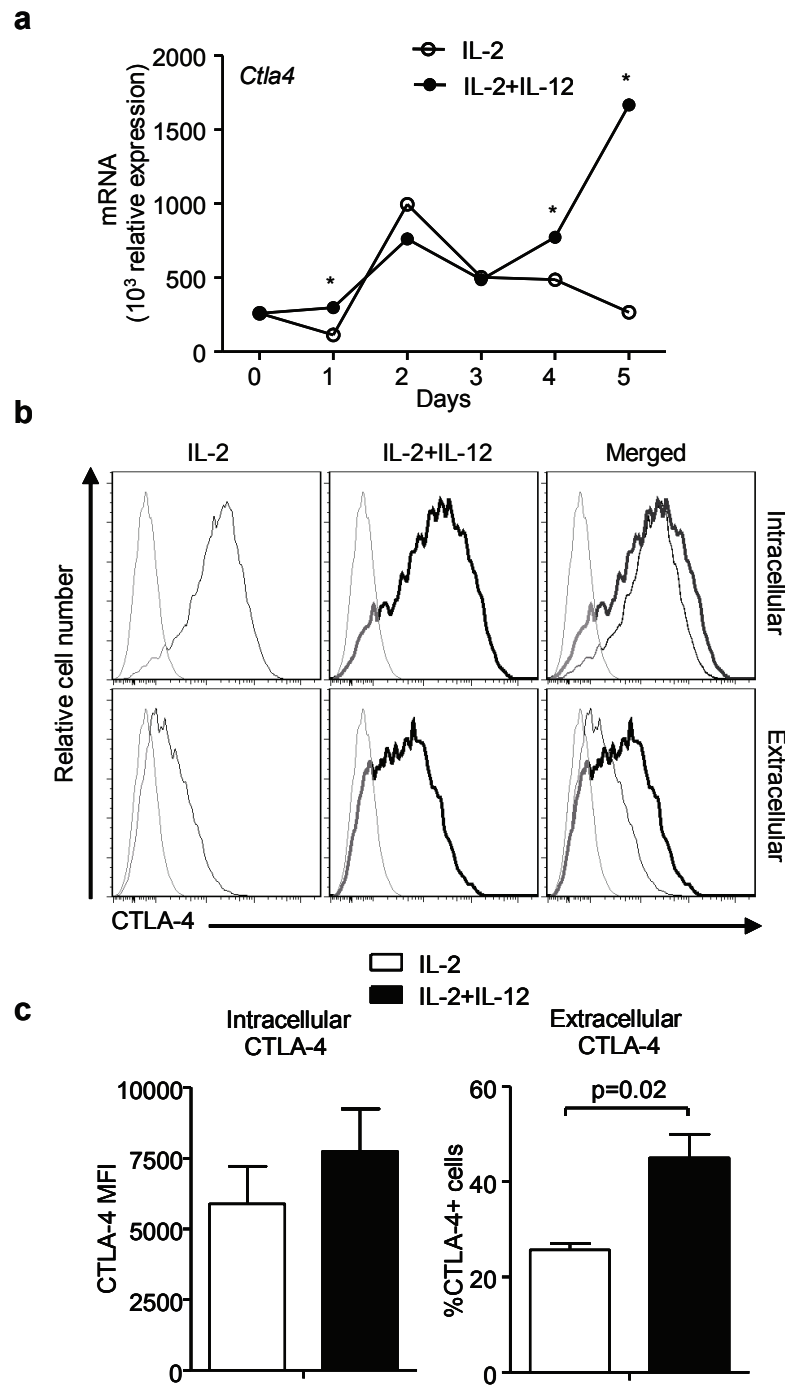

Supplementary Figure 14. CTLA-4 expression

Supplement: NIHMS466509-supplement-Supplementary_fig__14.pdf [file NIHMS466509-supplement-Supplementary_fig__14.pdf]

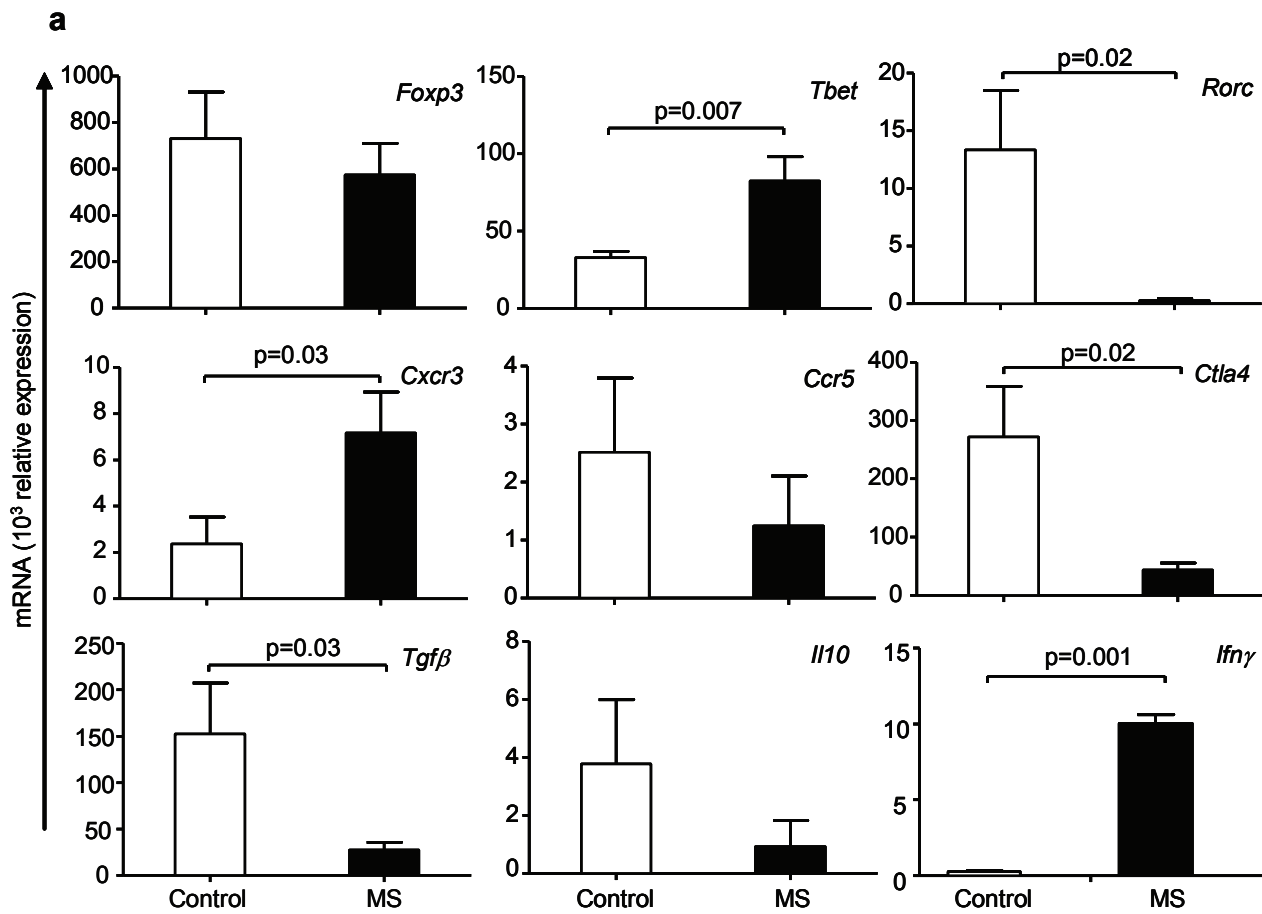

Supplementary Figure 15. Phenotypic characterization of ex vivo MS Tregs

Supplement: NIHMS466509-supplement-Supplementary_fig__15.pdf [file NIHMS466509-supplement-Supplementary_fig__15.pdf]

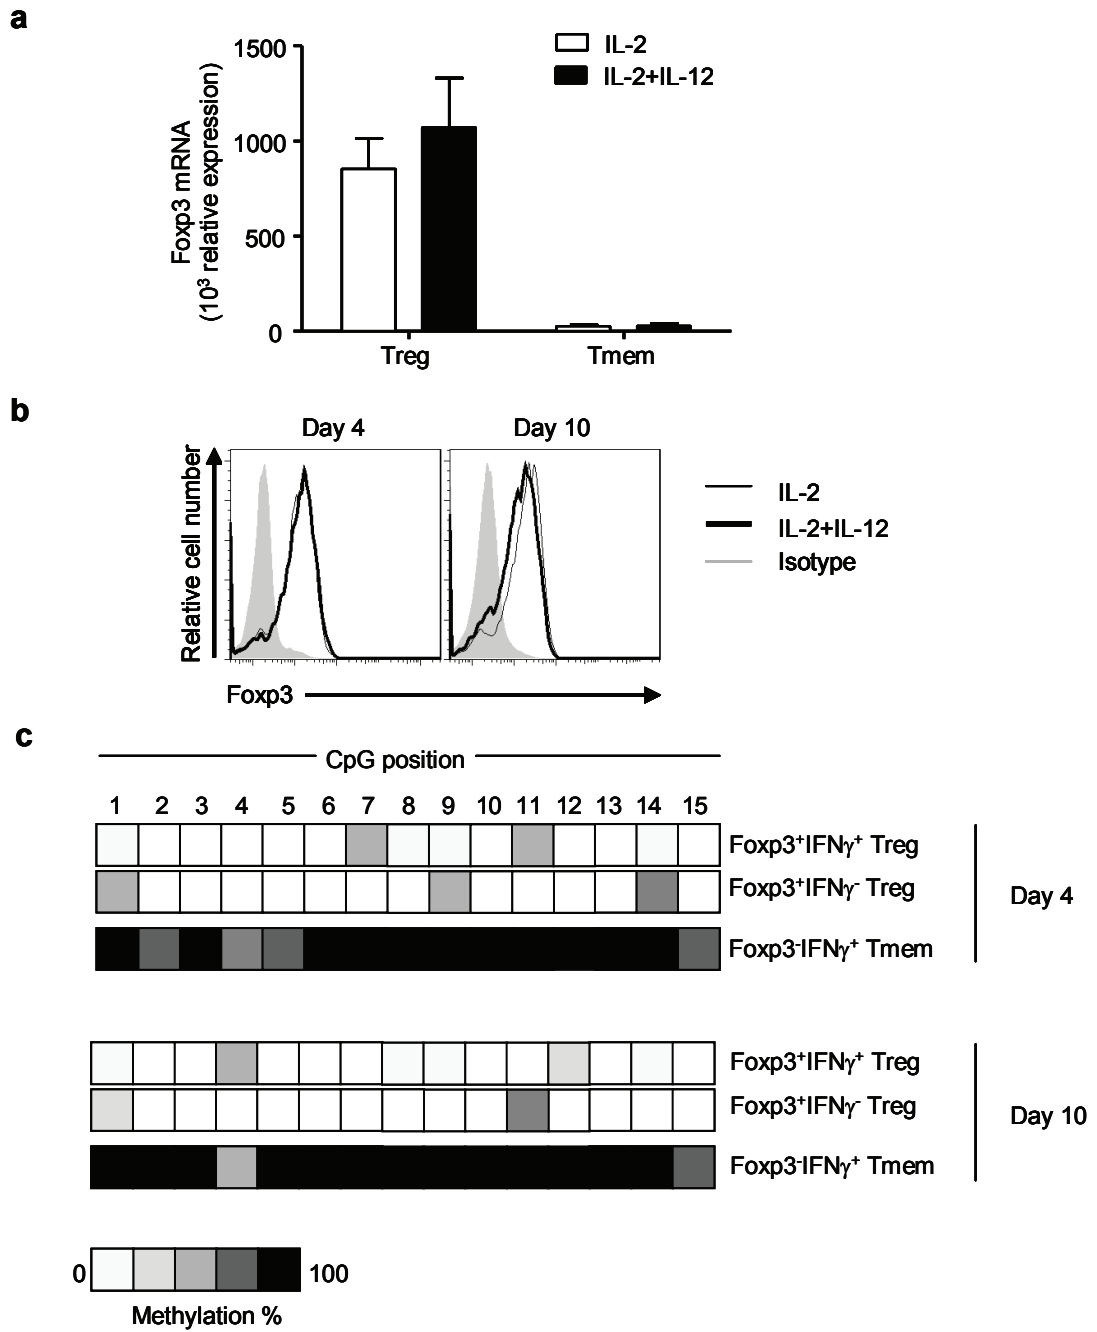

Supplementary Figure 2. Foxp3 stability after IL-12 treatment

Supplement: NIHMS466509-supplement-Supplementary_fig__2.pdf [file NIHMS466509-supplement-Supplementary_fig__2.pdf]

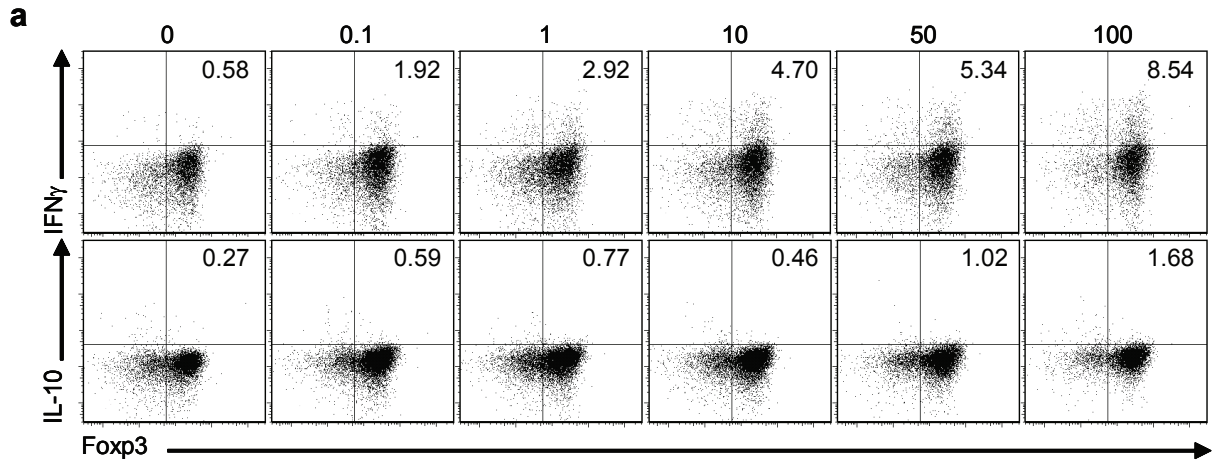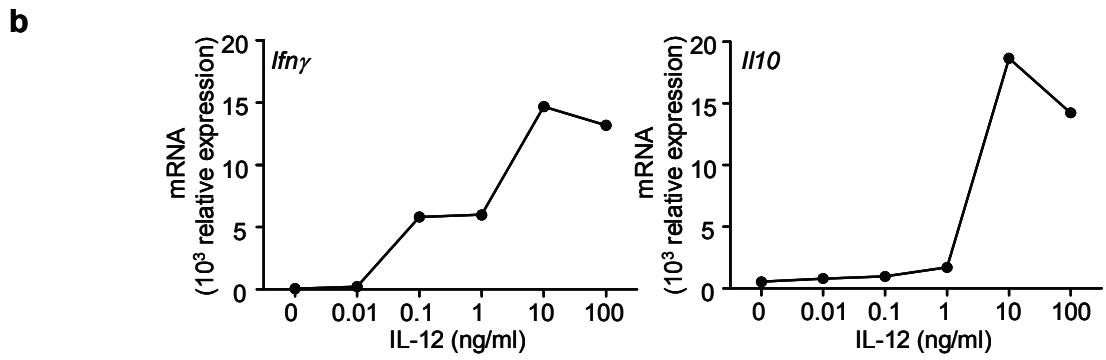

Supplementary Figure 3. IL-12 dose-response

Supplement: NIHMS466509-supplement-Supplementary_fig__3.pdf [file NIHMS466509-supplement-Supplementary_fig__3.pdf]

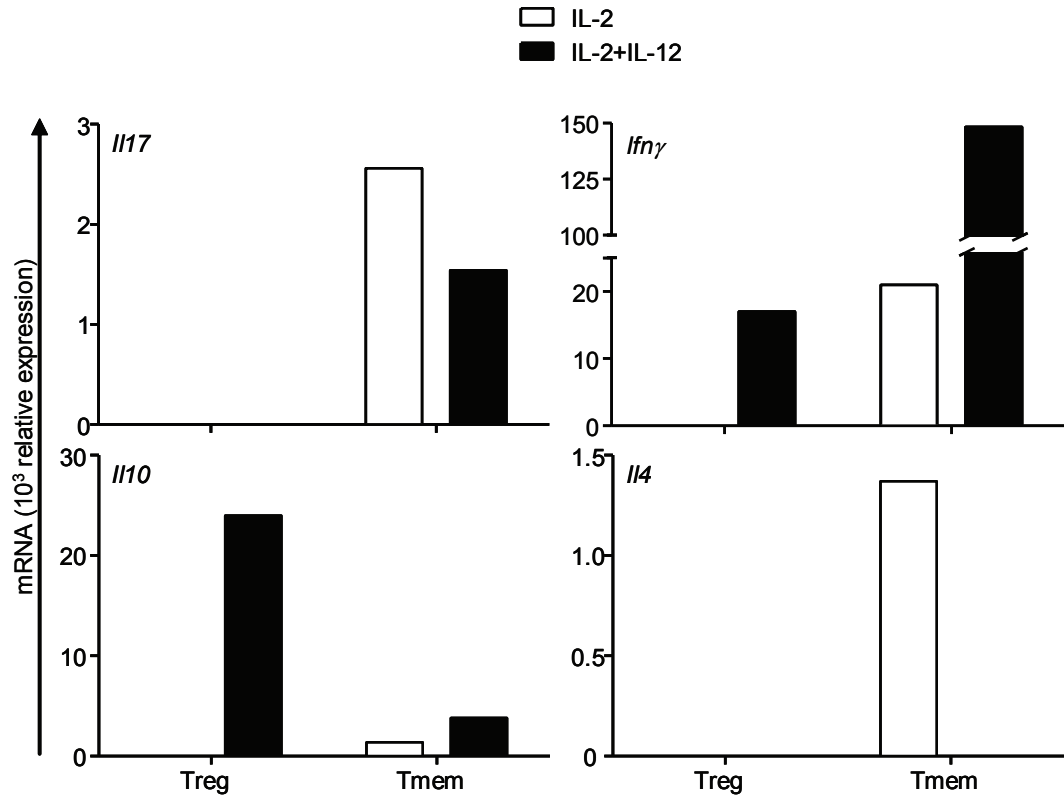

Supplementary Figure 4. Cytokine gene expression in *ex vivo* Tregs

Supplement: NIHMS466509-supplement-Supplementary_fig__4.pdf [file NIHMS466509-supplement-Supplementary_fig__4.pdf]

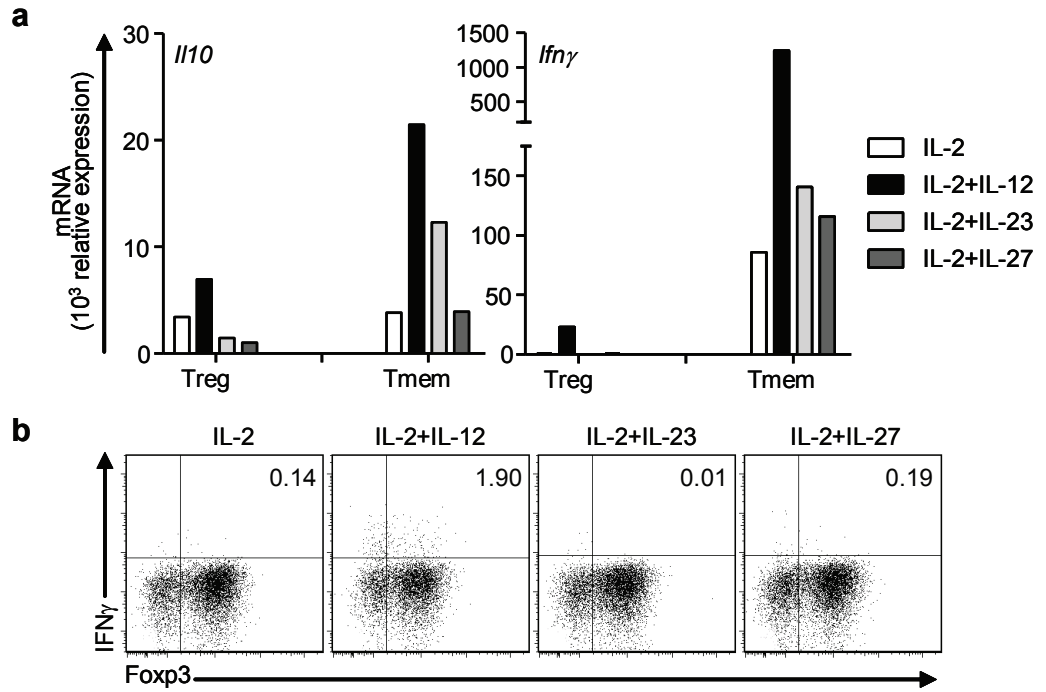

Supplementary Figure 5. Effect of IL-12 family of cytokines on IFN $\gamma$  production

Supplement: NIHMS466509-supplement-Supplementary_fig__5.pdf [file NIHMS466509-supplement-Supplementary_fig__5.pdf]

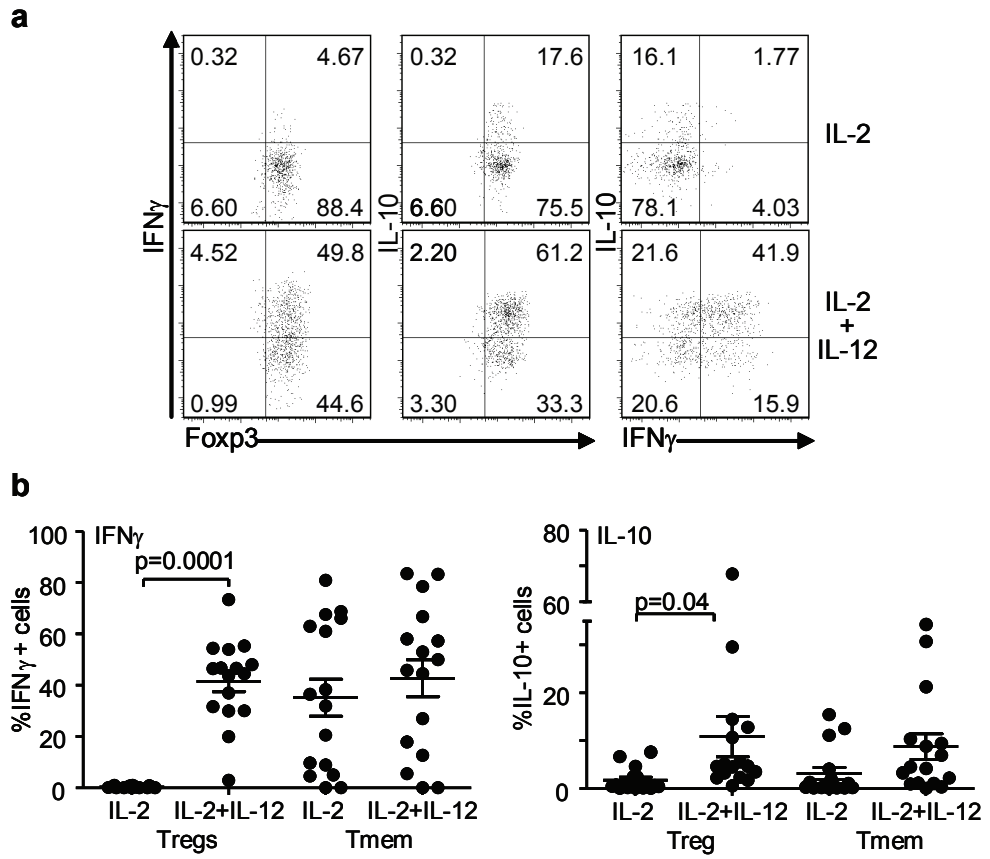

Supplementary Figure 6. IFN $\gamma$  and IL-10 production by Treg clones.

Supplement: NIHMS466509-supplement-Supplementary_fig__6.pdf [file NIHMS466509-supplement-Supplementary_fig__6.pdf]

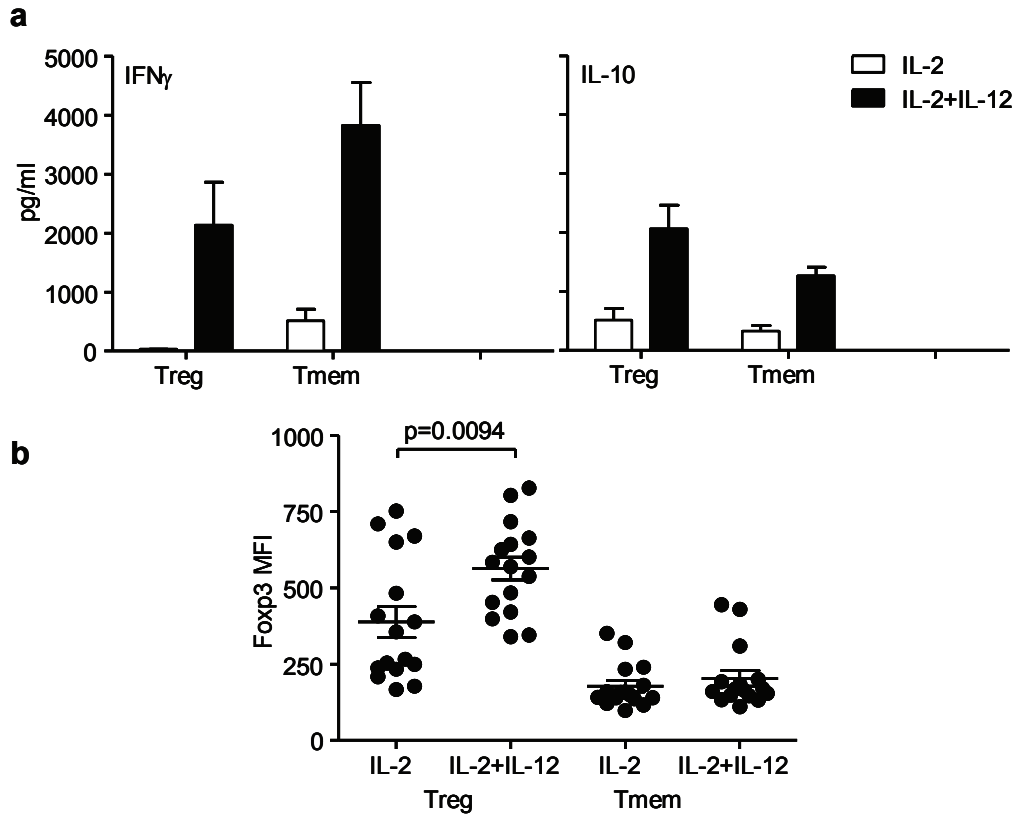

Supplementary Figure 7. IFN $\gamma$  and IL-10 secretion by Treg clones

Supplement: NIHMS466509-supplement-Supplementary_fig__7.pdf [file NIHMS466509-supplement-Supplementary_fig__7.pdf]

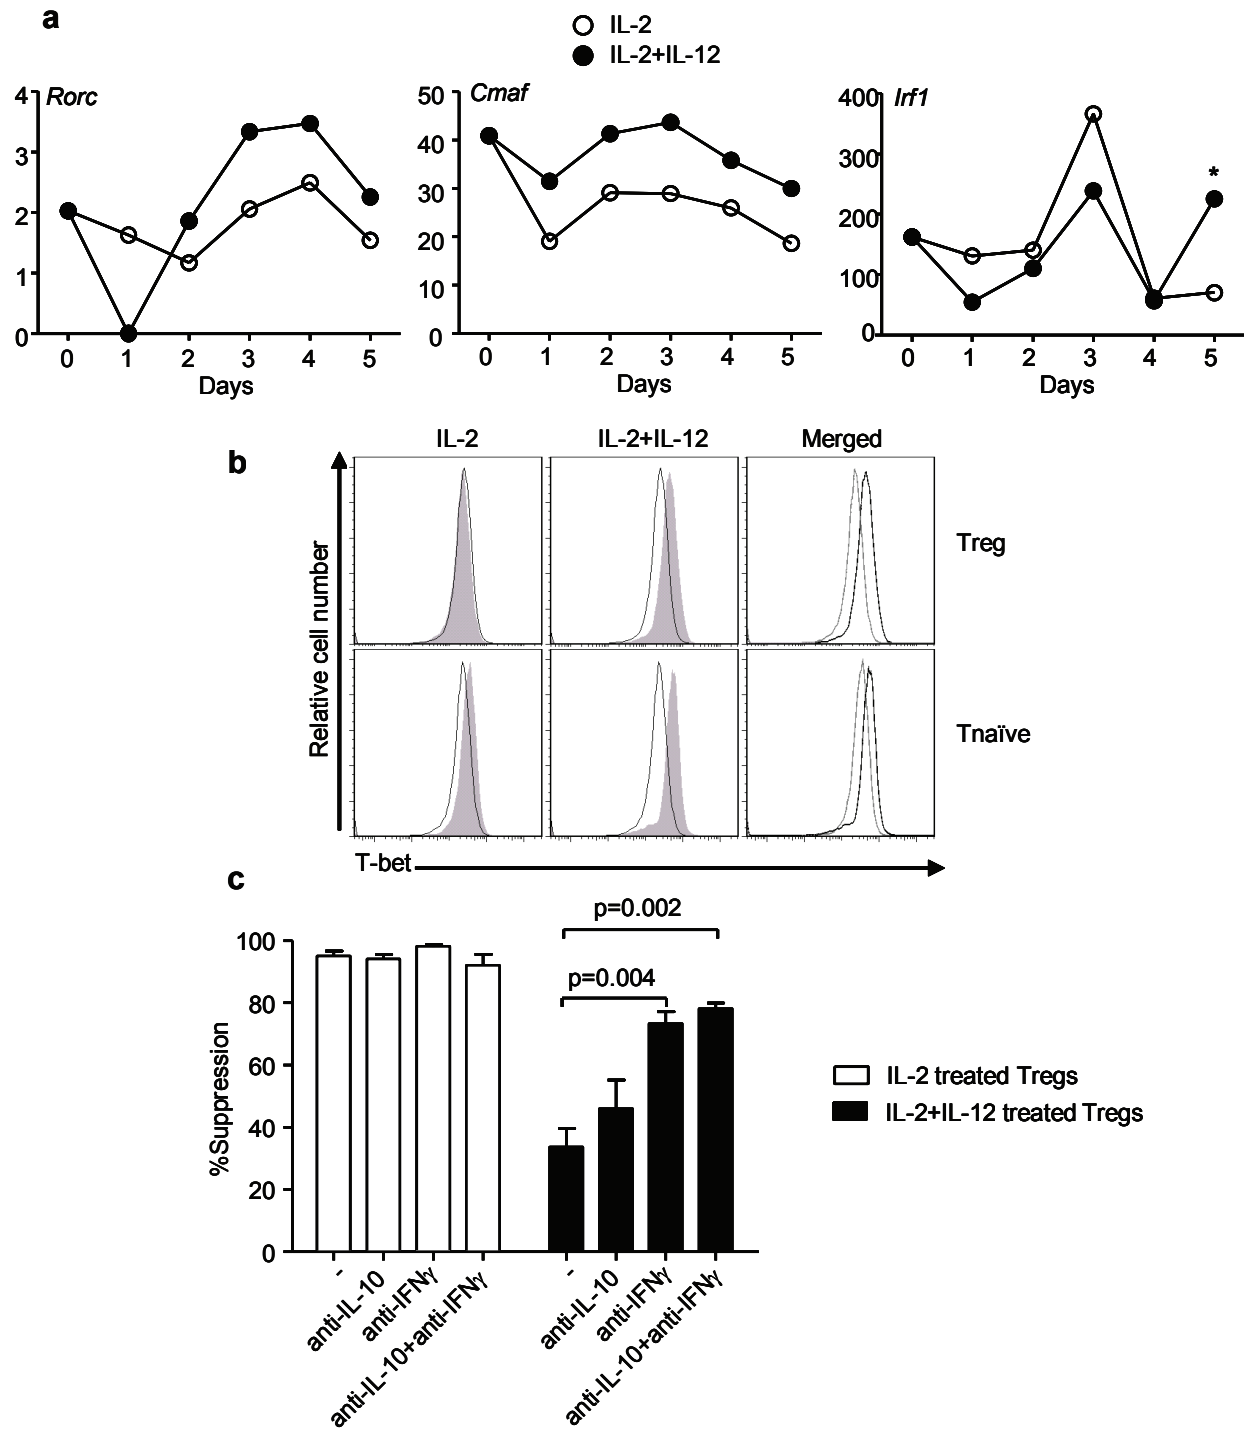

Supplementary Figure 8. Transcription factor expression and suppression upon IL-12 treatment

Supplement: NIHMS466509-supplement-Supplementary_fig__8.pdf [file NIHMS466509-supplement-Supplementary_fig__8.pdf]

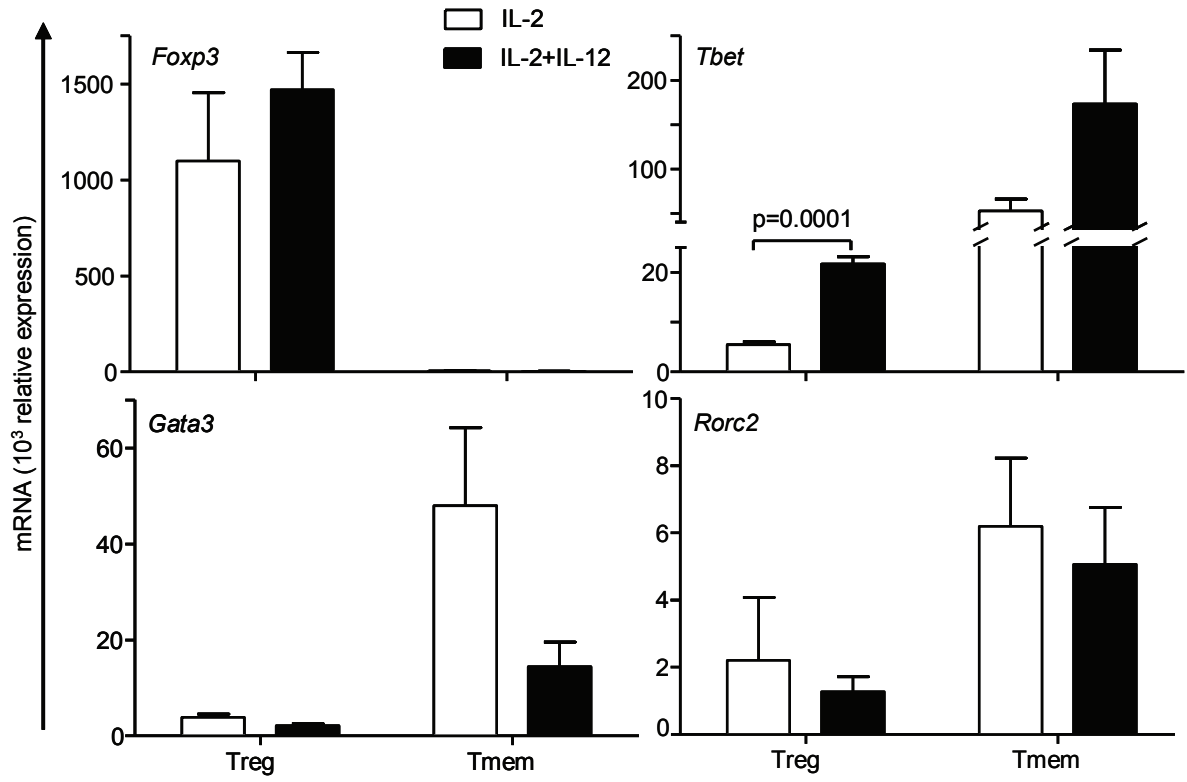

Supplementary Figure 9. Transcription factors gene expression.

Supplement: NIHMS466509-supplement-Supplementary_fig__9.pdf [file NIHMS466509-supplement-Supplementary_fig__9.pdf]
